# Supplementary material for: The bioinformatics and experimental analysis of CD276 for prognosis and immune infiltrates in colon adenocarcinoma
Source: Research Square preprint supplement (doi:10.21203/rs.3.rs-1987050/v1), 2022-08-29
Supplement: Supplementary file 1 [file 343a844988615574fbeeb1f5.docx]

Table 2 | Cox regression analysis for clinical outcomes in COAD patients.

| Characteristic | overall survival  HR (95% CI) *P* | | | | disease-specific survival  HR (95% CI) *P* | | | | progression-free interval  HR (95% CI) *P* | | | |
| --- | --- | --- | --- | --- | --- | --- | --- | --- | --- | --- | --- | --- |
| Univariate analysis | | Multivariate analysis | | Univariate analysis | | Multivariate analysis | | Univariate analysis | | Multivariate analysis | |
| HR (95% CI) | *P** | HR (95% CI) | *P** | HR (95% CI) | *P** | HR (95% CI) | *P** | HR (95% CI) | *P** | HR (95% CI) | *P** |
| Age (≧ 65 vs. <65) | - | - | - | - | - | - | - | - | - | - | - | - |
| Gender (Female vs. Male) | 0.89(0.6,1.34) | 0.584 | - | - | 0.9(0.54,1.51) | 0.697 | - | - | 0.82(0.56,1.18) | 0.284 | - | - |
| T stage(T3-T4 vs. Tis-T2) | 0.32(0.14,0.75) | **0.008** | 1.68(0.15,19.18) | 0.675 | 0.08(0.01,0.56) | **0.011** | 0(0,Inf) | 1.000 | 0.27(0.12,0.58) | **0.001** | 0.87(0.1,7.96) | 0.904 |
| N stage(T1-T2 vs. N0) | 3.14(2.04,4.84) | **<0.001** | 1.26(0.06,27.57) | 0.884 | 5.77(3.12,10.69) | **<0.001** | 2.21(0.05,95.06) | 0.679 | 3.13(2.12,4.64) | **<0.001** | 1.8(0.26,12.34) | 0.548 |
| M stage(M1 vs. M0) | 4.79(2.96,7.73) | **<0.001** | 5.23(0.38,71.81) | 0.215 | 9.6(5.38,17.12) | **<0.001** | 18(0.4,811.2) | 0.137 | 5.87(3.8,9.06) | **<0.001** | 1.29(0.19,8.84) | 0.798 |
| TNM stage (II vs. I) | 2.21(0.77,6.33) | 0.141 | 0.45(0.01,19.87) | 0.680 | 3.46(0.44,27.38) | 0.239 | 87942.45(0,Inf) | 1.000 | 2.7(1.06,6.89) | **0.038** | 2.22(0.09,53.35) | 0.622 |
| TNM stage (III vs. I) | 4.28(1.51,12.14) | **0.006** | 11.12(0.17,721.69) | 0.258 | 10.7(1.43,80.19) | **0.021** | 6738319.56(0,Inf) | 1.000 | 4.33(1.69,11.06) | **0.002** | 5.52(0.17,175.5) | 0.333 |
| TNM stage (IV vs. I) | 11.28(3.97,32.07) | **<0.001** | 5.17(0.09,307.23) | 0.430 | 43.94(5.98,322.83) | **<0.001** | 1912705.7(0,Inf) | 1.000 | 16.81(6.61,42.74) | **<0.001** | 9.71(0.22,424.51) | 0.238 |
| CEA level (normal vs. abnormal) | 0.34(0.2,0.6) | **<0.001** | 1.85(0.45,7.53) | 0.392 | 0.36(0.18,0.69) | **0.002** | 5.22(0.79,34.51) | 0.086 | 0.36(0.23,0.58) | **<0.001** | 0.82(0.31,2.2) | 0.692 |
| Residual_tumor (R0 vs. R1-R2) | 4.94(2.7,9.03) | **<0.001** | 5.76(1.36,24.3) | **0.017** | 6.74(3.52,12.92) | **<0.001** | 42.39(3.4,528.75) | **0.004** | 4.79(2.81,8.19) | **<0.001** | 2.64(0.76,9.16) | 0.126 |
| Vasucular invasion (YES vs. NO) | 0.38(0.24,0.59) | **<0.001** | 0.87(0.24,3.19) | 0.831 | 0.25(0.14,0.43) | **<0.001** | 1.67(0.26,10.6) | 0.586 | 0.34(0.22,0.5) | **<0.001** | 0.5(0.19,1.35) | 0.172 |
| Lymph_node invasion (YES vs. NO) | 2.25(1.46,3.47) | **<0.001** | 0.63(0.17,2.34) | 0.495 | 3.77(2.11,6.74) | **<0.001** | 0.86(0.12,6.21) | 0.878 | 2.37(1.6,3.49) | **<0.001** | 0.59(0.18,1.97) | 0.392 |
| Perineural invasion (YES vs. NO) | 1.89(0.96,3.71) | 0.066 | - | - | 2.8(1.25,6.26) | **0.012** | 0.52(0.07,3.72) | 0.514 | 2.28(1.24,4.2) | **0.008** | 2.25(0.61,8.24) | 0.222 |
| Radiation therapy (YES vs. NO) | 0.63(0.09,4.54) | 0.646 | - | - | 0.87(0.12,6.3) | 0.890 | - | - | 1.52(0.48,4.81) | 0.477 | - | - |
| MMR status (dMMR vs. pMMR) | 5.67(1.38,23.36) | **0.016** | 4.97(0.81,30.63) | 0.084 | 4.5(1.08,18.65) | **0.038** | 3.01(0.3,30.09) | 0.348 | 1.45(0.77,2.75) | 0.253 | - | - |
| MSI status (MSI-H vs. non MSI-H) | 0.85(0.5,1.46) | 0.568 | - | - | 0.74(0.37,1.51) | 0.414 | - | - | 0.75(0.45,1.25) | 0.268 | - | - |
| Kras (Mut vs. Wild) | 0.8(0.34,1.85) | 0.599 | - | - | 0.67(0.18,2.5) | 0.550 | - | - | 1.31(0.56,3.05) | 0.528 | - | - |
| neoadjuvant_treatment (Yes vs. No) | 3.67(0.51,26.53) | 0.198 | - | - | 4.99(0.69,36.38) | 0.112 | - | - | 2.4(0.33,17.25) | 0.385 | - | - |
| CD276 (high vs. low) | 1.02(1,1.04) | **0.031** | 1.04(0.98,1.11) | 0.192 | 1.04(1.01,1.06) | **0.002** | 1.06(0.97,1.15) | 0.221 | 1.03(1.01,1.05) | **0.004** | 1.01(0.96,1.06) | 0.721 |

*Statistically significant p values are given in bold, P < 0.05

HR, hazard ratio; COAD, Colon adenocarcinoma; MMR, mismatch repair; dMMR, MMR absent; Pmmr, MMR proficient; MSI, microsatellite instability; MSI-H, MSI-high; CI, confidence interval.
